# Supplementary material for: Versatile nano-platforms for hybrid systems: expressing spin-transition behavior on nanoparticles
Source: Royal Society of Chemistry journal article supplement (doi:10.1039/c5tc00021a), 2015-01-01
Supplement: c5tc00021a1.pdf [file c5tc00021a1.pdf]

## Electronic Supporting Information

### Versatile Nano-platforms for Hybrid Systems: Revealing Spin-crossover Behavior on Nanoparticles

*Aurélie Paquirissamy, Alexander R. Ruyack, Abhishake Mondal, Yanling Li, Rodrigue Lescouëzec, Corinne Chanéac,\* and Benoit Fleury\**

**Infra-Red Spectra of the hybrid nanoparticles: APTES-coated silica (red), HBIP-functionalized hybrid (black) and final Fe(II) hybrid (blue).**

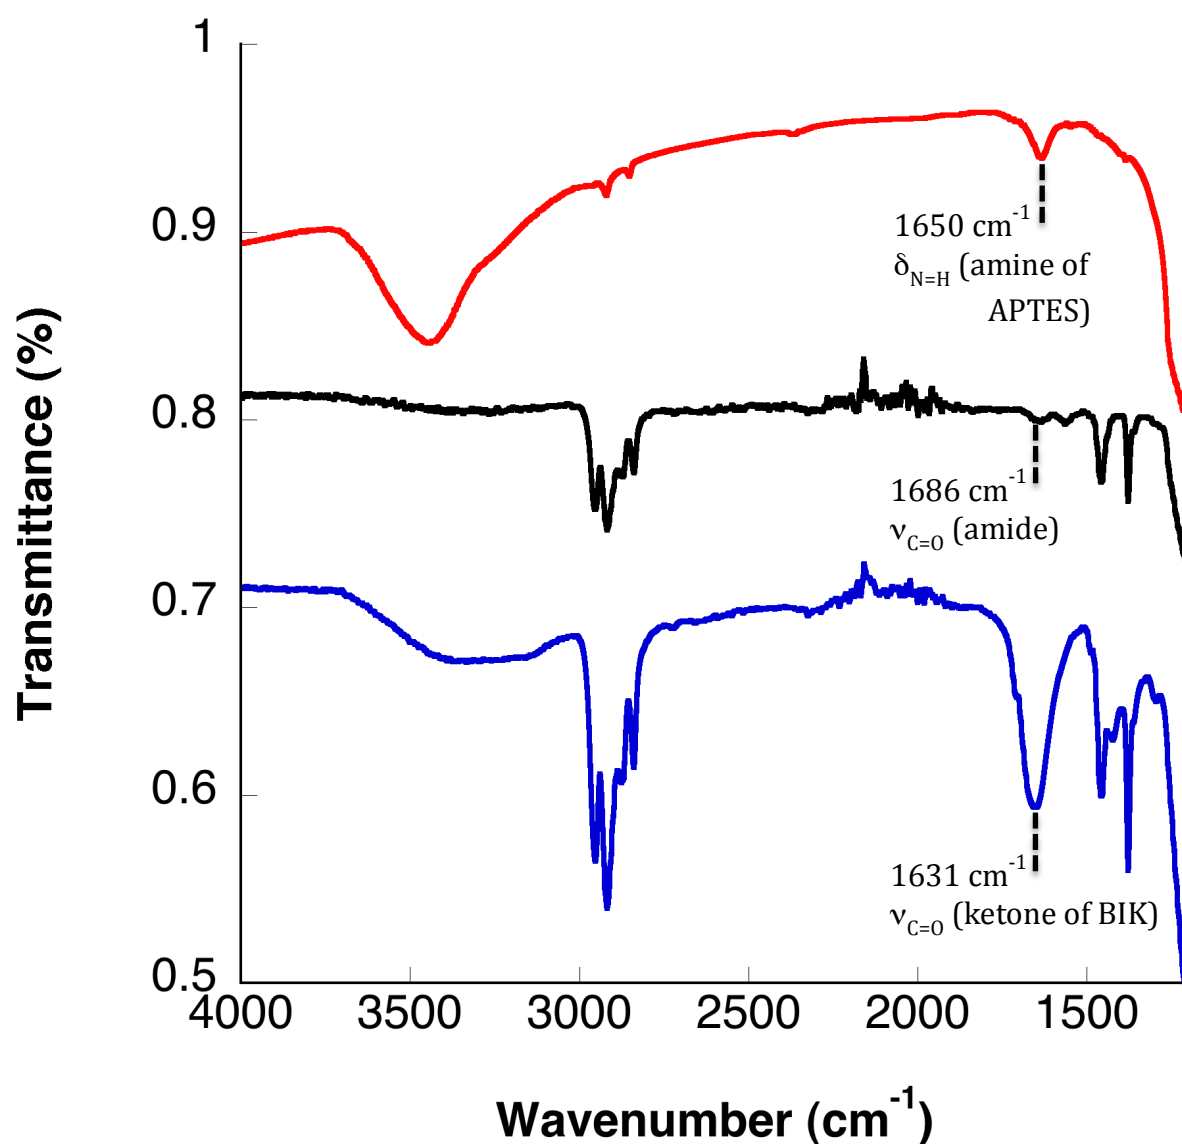

### Estimation of the maximum $\chi_m T$ value for Hybrid Spin-Transition Nanoparticles (HSTNs)

The effective magnetic moment  $\mu_{eff}$  of a mononuclear complex bearing  $n$  unpaired electrons ( $n = 4$  for HS Fe(II)) and a molar magnetic susceptibility  $\chi_M$  is given by:

$$\mu_{eff} = \sqrt{n(n+2)} = \frac{\sqrt{3kT\chi_M}}{N\beta} = 2.828\sqrt{\chi_M T}$$

with  $n = 4$ ,  $\mu_{eff} = 4.89 \mu_B$

$$\text{and } \chi_M = \frac{(4.89/2.828)^2}{T}$$

$$\chi_M = 0.01 \text{ emu at } 300 \text{ K}$$

The massic susceptibility  $\chi_m$  at 300 K is then equal to  $\frac{\chi_M}{M}$ . The molecular mass of the complex made of the APTES-BIP-Fe-(BIK)<sub>2</sub> chain with two tetrafluoroborate as counter ions is  $M = 977 \text{ g.mol}^{-1}$  leading to  $\chi_m = 1.10^{-5} \text{ emu}$  and at 300 K,  $\chi_m T = 3.10^{-3} \text{ cm}^3 \cdot \text{K} \cdot \text{g}^{-1}$ .

| Molecular formula of the grafted unit                                                | Molecular weight         | $\chi_m T$<br>$\text{cm}^3 \cdot \text{K} \cdot \text{g}^{-1}$ |
|--------------------------------------------------------------------------------------|--------------------------|----------------------------------------------------------------|
| 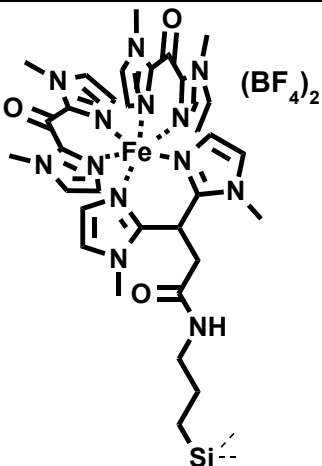   | 977 g.mol <sup>-1</sup>  | 3.10 <sup>-3</sup>                                             |
|  | 2181 g.mol <sup>-1</sup> | 1.3.10 <sup>-3</sup>                                           |

## Method for the determination of the amino coverage on the silica cores after the APTES coating

Known masses of approximately 30 mg of the APTES-functionalized particles are reacted with 3.40 mg ( $10 \cdot 10^{-6}$  mol) of N-(9H-fluoren-2-ylmethoxycarbonyloxy)succinimide (FMOC-OSu) in 20 mL of dry DMF and in the presence of  $\text{Et}_3\text{N}$ . The solutions are stirred by ultra-sonication before and during 10 min more after the addition of FMOC-OSu in order to prevent aggregation of the particles. The solid is then separated by centrifugation and the remaining solution of unreacted FMOC-OSu is diluted 10 times before titration by UV-Vis spectroscopy, following the absorbance of the solution at 280 nm. A calibration line has been established using 8 FMOC-OSu solutions ranging from  $2 \cdot 10^{-6}$  to  $70 \cdot 10^{-6}$  mol.L<sup>-1</sup>.

For each aliquot, the number of titrated particles is given by:

$$\frac{m}{\text{mass of one particle}} = \frac{m}{\text{volume of one particle} \times \text{density}} = \frac{m}{\frac{4}{3}\pi R^3 \times d} \quad (1)$$

with  $m$  being the mass of particles used for titration,  $R$  the radius of the particles and  $d$  the density of silica ( $2 \cdot 10^{-21}$  g.nm<sup>-3</sup>).

From (1), the accessible surface during titration is thus given by:

$$S = \text{surface of one particle} \times \text{number of particles} = 4\pi R^2 \times \frac{m}{\frac{4}{3}\pi R^3 \times d} \quad (2)$$

and at last, the amount of grafted APTES per unit surface is:

$$n = \frac{n_{\text{FMOC-OSu}}}{S} \quad (3)$$

with  $n_{\text{FMOC-OSu}}$  the amount of reacted FMOC-OSu determined by titration and assuming that the reaction between FMOC-OSu and APTES is quantitative.

From equations (1), (2) and (3), it appears that the parameters to be controlled in order to get an accurate value for  $n$  are: the exact mass of particles  $m$  and the radius  $R$  of the particles.  $R$  is determined by TEM microscopy. The mass  $m$  has been corrected after TGA analysis revealing a 10% loss in weight between 28°C and 330°C. This loss is due to a large amount of solvents blocked in the particles because of their porosity.

On a series of 7 titration experiments, with  $R = 18.4$  nm, the amino titration gave:

$$n = 6.4 \cdot 10^{-25} \text{ mol.nm}^{-2} \text{ (i.e. 0.4 amino group/nm}^2\text{)}$$
